# Supplementary material for: Development of Nonlaboratory-Based Risk Prediction Models for Cardiovascular Diseases Using Conventional and Machine Learning Approaches
Source: MDPI journal article supplement (doi:10.3390/ijerph182312586), 2021-11-29
Supplement: s1 [file s1]

**Supplementary Table.** Performance of baseline and ML-based RPMs using 5-folds cross-validation

| Models           | ANN   |         | Linear SVM |         | RBF-SVM |         | RF    |         | Baseline RPM |         |
|------------------|-------|---------|------------|---------|---------|---------|-------|---------|--------------|---------|
| Confusion Matrix | Case  | Control | Case       | Control | Case    | Control | Case  | Control | Case         | Control |
| Case             | 178   | 52      | 181        | 49      | 177     | 53      | 180   | 50      | 181          | 49      |
| Control          | 40    | 190     | 41         | 189     | 50      | 180     | 55    | 175     | 50           | 180     |
| Sensitivity      | 0.774 |         | 0.787      |         | 0.770   |         | 0.783 |         | 0.787        |         |
| Specificity      | 0.826 |         | 0.822      |         | 0.783   |         | 0.761 |         | 0.783        |         |
| Accuracy         | 80.00 |         | 80.44      |         | 77.60   |         | 77.20 |         | 78.47        |         |
| AUC              | 0.868 |         | 0.861      |         | 0.844   |         | 0.849 |         | 0.854        |         |
| Kappa-statistic  | 0.601 |         | 0.601      |         | 0.560   |         | 0.551 |         | 0.570        |         |
| RMSE             | 0.381 |         | 0.402      |         | 0.416   |         | 0.412 |         | 0.402        |         |
| NRI              | 3.0%  |         | 3.9%       |         | -1.7%   |         | -2.6% |         |              |         |
